# Supplementary material for: Quantum dynamics simulations of the thermal and light-induced high-spin to low-spin relaxation in Fe(bpy)3 and Fe(mtz)6
Source: Royal Society of Chemistry journal article supplement (doi:10.1039/d2fd00027j), 2022-01-01
Supplement: d2fd00027j1.pdf [file d2fd00027j1.pdf]

## ARTICLE TYPE

Cite this: DOI: 00.0000/xxxxxxxxxx

# Quantum dynamics simulations of the thermal and light-induced high-spin to low-spin relaxation in $\text{Fe}(\text{bpy})_3$ and $\text{Fe}(\text{mtz})_6$ †

Marc Alías-Rodríguez,<sup>\*a,b</sup> Miquel Huix-Rotllant<sup>b</sup> and Coen de Graaf<sup>†a,c</sup>

Received Date

Accepted Date

DOI: 00.0000/xxxxxxxxxx

## Contents

|                                         |          |
|-----------------------------------------|----------|
| <b>1 Thermal relaxation</b>             | <b>2</b> |
| 1.1 CASSCF active space . . . . .       | 2        |
| 1.2 Relaxed scan . . . . .              | 2        |
| <b>2 Light-induced process</b>          | <b>3</b> |
| 2.1 Model Hamiltonian . . . . .         | 3        |
| 2.1.1 Non-adiabatic couplings . . . . . | 3        |
| 2.1.2 Diabatic potentials . . . . .     | 3        |
| 2.1.3 Spin-orbit coupling . . . . .     | 4        |

<sup>a</sup>Departament de Química Física i Inorgànica, Universitat Rovira i Virgili, Marcel·lí Domingo 143007 Tarragona, Catalunya, Spain.

<sup>b</sup>Aix-Marseille Univ, CNRS, ICR, Marseille, France. E-mail: marc.alias-rodriquez@univ-amu.fr

<sup>c</sup>CREA, Passeig Lluís Companys 23, Barcelona, Spain

# 1 Thermal relaxation

We add here some more detailed information about the active space, the relaxed scan and the metadynamics that we have performed to determine the thermal relaxation in  $[\text{Fe}(\text{bpy})_3]^{2+}$  and  $[\text{Fe}(\text{mtz})_6]^{2+}$ .

## 1.1 CASSCF active space

CASPT2 calculations have been performed using as reference a SA-CASSCF wave function. The active space for the reference wave function is formed by two  $\sigma$  orbitals formally from the ligands, five 3d-type Fe-orbitals (three  $t_{2g}$  and two  $e_g$ ) and five 4d orbitals from Fe. Note that the same active space has been employed to obtain the adiabatic energies used in the fitting procedure of the model Hamiltonian. Three extra  $\pi^*$  orbitals from the ligands have been added in only one calculation to study the effect of the MLCT states.

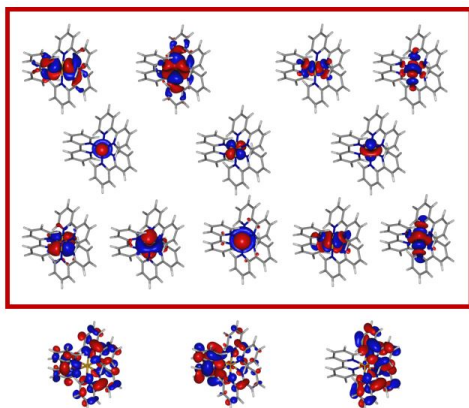

**Fig. 1** Active space natural orbitals in  $[\text{Fe}(\text{bpy})_3]^{2+}$  for a CAS(10,15). Two  $\sigma$  orbitals in top-left,  $e_g$  orbitals in the top-right,  $t_{2g}$  orbitals in the second-row, Fe 4d orbitals in the third row and  $\pi^*$  at the bottom. In red the MOs that are also found in a CAS(10,12). Note that the same type orbitals are present in  $[\text{Fe}(\text{mtz})_6]^{2+}$ .

## 1.2 Relaxed scan

The adiabatic energies are computed at CASPT2 level. Unfortunately, CASPT2 optimizations are not straightforward, therefore, we performed a relaxed scan (constrained optimization at B3LYP/def2-SVP level) along the main reaction coordinate, the Fe-N symmetric stretching mode.

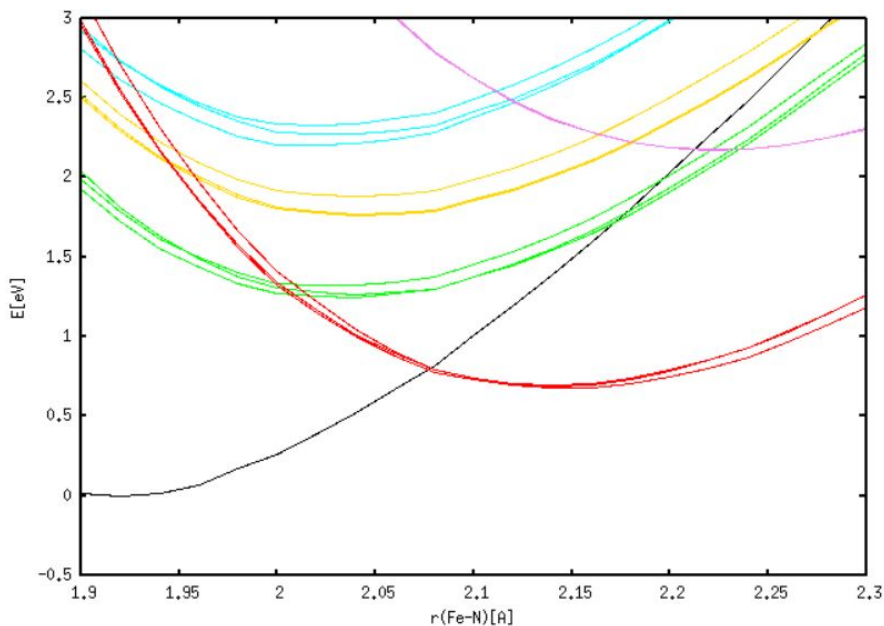

**Fig. 2** Relaxed scan at CASPT2 level along the Fe-N symmetric stretching in  $[\text{Fe}(\text{bpy})_3]^{2+}$ .  ${}^1A_{1g}$  in black,  ${}^1T_{1g}$  in cyan,  ${}^3T_{1g}$  in green,  ${}^3T_{2g}$  in gold,  ${}^5T_{2g}$  in red and  ${}^5E_g$  in violet.

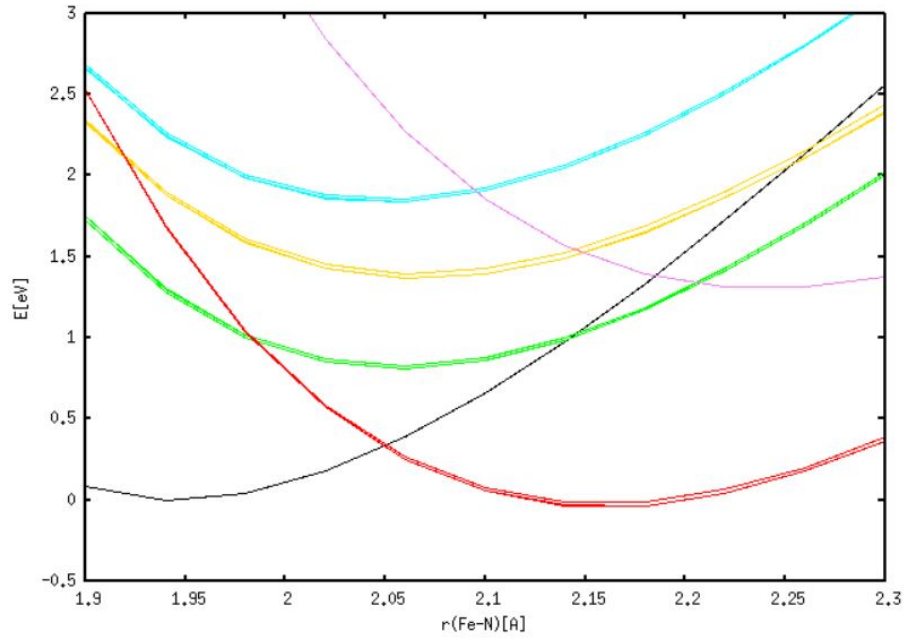

**Fig. 3** Relaxed scan at CASPT2 level along the Fe-N symmetric stretching in  $[\text{Fe}(\text{bpy})_3]^{2+}$ .  ${}^1\text{A}_{1g}$  in black,  ${}^1\text{T}_{1g}$  in cyan,  ${}^3\text{T}_{1g}$  in green,  ${}^3\text{T}_{2g}$  in gold,  ${}^5\text{T}_{2g}$  in red and  ${}^5\text{E}_g$  in violet.

The Fe-N distances in the minima of the relaxed scan curves are similar to those reported by Finney et al. in a CASPT2 optimization in the case of  $[\text{Fe}(\text{bpy})_3]^{2+}$ .<sup>1</sup>

**Table 1** Distances of the CASPT2 quasi-equilibrium geometries [ $\text{\AA}$ ] through a relaxed scan and optimized distances at (XMS-)CASPT2 level in the HS and LS of  $[\text{Fe}(\text{bpy})_3]^{2+}$  and  $[\text{Fe}(\text{mtz})_6]^{2+}$ .

| State | $[\text{Fe}(\text{bpy})_3]^{2+}$ |              | $[\text{Fe}(\text{mtz})_6]^{2+}$ |
|-------|----------------------------------|--------------|----------------------------------|
|       | Relaxed scan                     | CASPT2 opt.* | Relaxed scan                     |
| LS    | 1.940                            | 1.941        | 1.940                            |
| HS    | 2.140                            | 2.168/2.182  | 2.180                            |

(\*) apical and equatorial values reported for the HS.

## 2 Light-induced process

### 2.1 Model Hamiltonian

Here, we present the numerical value of the parameters of the model Hamiltonian. The nuclear kinetic energy only depends on the frequencies of the HS state:  $\omega_{31} = 112 \text{ cm}^{-1}$ ,  $\omega_{33} = 115 \text{ cm}^{-1}$  and  $\omega_{rc} = 147 \text{ cm}^{-1}$ . The parameters for the diabatic potentials, the non-adiabatic and the spin-orbit couplings whose expressions are defined in the main text are reported here.

#### 2.1.1 Non-adiabatic couplings

The non-adiabatic coupling term is described as

$$W_{n,n',S}^{NA} = \sum_i^{N_{vib}} \lambda_i^{n,n',S} q_i \quad (1)$$

All the linear expansion terms for the non-adiabatic coupling are smaller than  $0.1 \text{ cm}^{-1}$ , therefore, they are not reported.

#### 2.1.2 Diabatic potentials

The diabatic potentials are defined as

$$V_n^S = E_n^S + \sum_i^{N_{vib}} \sum_{j=1}^4 \frac{1}{j!} k_{j,i}^{n,S} q_i^j \quad (2)$$

**Table 2** Parameters for the diabatic potentials in  $\text{cm}^{-1}$ .

|               | $E_n$   | $k_{1,31}$ | $k_{2,31}$ | $k_{3,31}$ | $k_{4,31}$ | $k_{1,33}$ | $k_{2,33}$ | $k_{3,33}$ | $k_{4,33}$ | $k_{1,rc}$ | $k_{2,rc}$ | $k_{3,rc}$ | $k_{4,rc}$ |
|---------------|---------|------------|------------|------------|------------|------------|------------|------------|------------|------------|------------|------------|------------|
| $^1A_{1g}$    | 15522.2 | 17.9       | 24.5       | 4.8        | 2.3        | 36.2       | 20.2       | 2.1        | 2.1        | -1461.6    | 60.7       | 8.0        | 0.7        |
| $^1T_{1g}(1)$ | 22733.8 | -352.2     | 33.8       | 4.8        | 2.6        | -314.5     | 33.3       | 5.2        | 1.2        | -936.7     | 94.2       | 9.9        | 0.7        |
| $^1T_{1g}(2)$ | 23011.3 | 221.8      | 8.6        | 2.0        | 2.1        | 321.1      | 18.2       | 0.8        | 1.5        | -970.0     | 90.1       | 9.9        | 0.8        |
| $^1T_{1g}(3)$ | 23502.7 | 192.0      | 7.9        | 4.5        | 2.1        | 3.3        | -11.9      | 3.0        | 2.4        | -945.4     | 91.3       | 10.2       | 0.9        |
| $^3T_{1g}(1)$ | 12871.2 | 225.0      | -13.2      | -1.2       | 2.4        | 338.4      | -3.0       | -3.4       | 2.0        | -931.4     | 92.2       | 10.4       | 0.8        |
| $^3T_{1g}(2)$ | 13126.0 | -403.0     | 22.0       | 7.2        | 2.6        | -225.7     | -18.2      | 5.7        | 2.9        | -902.4     | 94.3       | 10.4       | 0.9        |
| $^3T_{1g}(3)$ | 13716.5 | 193.8      | -22.4      | 1.9        | 2.9        | 18.6       | -57.7      | 1.6        | 4.9        | -901.1     | 91.6       | 10.8       | 1.0        |
| $^3T_{2g}(1)$ | 17131.0 | -119.0     | 89.3       | 10.0       | 1.1        | -131.7     | 51.5       | -1.2       | 0.4        | -797.1     | 92.1       | 9.5        | 0.8        |
| $^3T_{2g}(2)$ | 17377.3 | 368.8      | 22.9       | 4.6        | 2.6        | 237.5      | 29.6       | 1.0        | 1.2        | -811.4     | 91.0       | 10.4       | 0.9        |
| $^3T_{2g}(3)$ | 17595.3 | -158.7     | 85.4       | 12.3       | 1.7        | 82.0       | 6.6        | -0.3       | 3.8        | -808.8     | 96.4       | 10.4       | 0.8        |
| $^5T_{2g}(1)$ | 0.0     | 58.1       | 58.7       | 5.8        | 1.6        | 15.5       | 43.7       | -1.1       | 2.2        | -369.8     | 128.9      | 12.8       | 1.1        |
| $^5T_{2g}(2)$ | 159.9   | -3.4       | 50.6       | 5.6        | 2.3        | -3.4       | 44.3       | 1.9        | 2.0        | -365.7     | 127.8      | 12.5       | 1.1        |
| $^5T_{2g}(3)$ | 935.9   | 14.5       | 66.2       | 6.9        | 1.7        | 12.9       | 53.1       | -1.0       | 2.1        | -332.8     | 129.1      | 12.3       | 1.0        |
| $^5E_g(1)$    | 10936.3 | -435.7     | 71.5       | 7.3        | 1.5        | -457.3     | 60.5       | 1.8        | 1.6        | 262.6      | 165.6      | 14.7       | 0.9        |
| $^5E_g(2)$    | 11223.0 | 478.2      | 60.2       | 4.0        | 1.6        | 401.0      | 41.2       | -0.6       | 2.5        | 216.5      | 160.8      | 14.3       | 1.4        |

### 2.1.3 Spin-orbit coupling

The spin-orbit coupling term is defined as follows

$$W_{nS\alpha, n'S'\alpha'}^{SO} = \langle nS\alpha | \hat{H}^{SO} | n'S'\alpha' \rangle \quad (3)$$

**Table 3** Singlet-triplet spin-orbit coupling in  $\text{cm}^{-1}$ .

| $nS, \alpha - n'S', \alpha'$               | $W^{SO}$      | $nS, \alpha - n'S', \alpha'$              | $W^{SO}$    | $nS, \alpha - n'S', \alpha'$              | $W^{SO}$      |
|--------------------------------------------|---------------|-------------------------------------------|-------------|-------------------------------------------|---------------|
| $^1A_{1g} - ^3T_{1g}(1) (\text{MS}=-1)$    | -16.0+236.1i  | $^1A_{1g} - ^3T_{1g}(1) (\text{MS}=0)$    | -0.0-440.6i | $^1A_{1g} - ^3T_{1g}(1) (\text{MS}=1)$    | -16.0-236.1i  |
| $^1A_{1g} - ^3T_{1g}(2) (\text{MS}=-1)$    | +77.4-320.6i  | $^1A_{1g} - ^3T_{1g}(2) (\text{MS}=0)$    | +0.0-362.2i | $^1A_{1g} - ^3T_{1g}(2) (\text{MS}=1)$    | +77.4+320.6i  |
| $^1A_{1g} - ^3T_{1g}(3) (\text{MS}=-1)$    | +397.4+52.8i  | $^1A_{1g} - ^3T_{1g}(3) (\text{MS}=0)$    | +0.0+23.1i  | $^1A_{1g} - ^3T_{1g}(3) (\text{MS}=1)$    | +397.4-52.8i  |
| $^1A_{1g} - ^3T_{2g}(1) (\text{MS}=-1)$    | -4.5+18.5i    | $^1A_{1g} - ^3T_{2g}(1) (\text{MS}=0)$    | -0.0-27.8i  | $^1A_{1g} - ^3T_{2g}(1) (\text{MS}=1)$    | -4.5-18.5i    |
| $^1A_{1g} - ^3T_{2g}(2) (\text{MS}=-1)$    | +22.6-1.8i    | $^1A_{1g} - ^3T_{2g}(2) (\text{MS}=0)$    | +0.0-15.6i  | $^1A_{1g} - ^3T_{2g}(2) (\text{MS}=1)$    | +22.6+1.8i    |
| $^1A_{1g} - ^3T_{2g}(3) (\text{MS}=-1)$    | -2.0+35.4i    | $^1A_{1g} - ^3T_{2g}(3) (\text{MS}=0)$    | -0.0-36.7i  | $^1A_{1g} - ^3T_{2g}(3) (\text{MS}=1)$    | -2.0-35.4i    |
| $^1T_{1g}(1) - ^3T_{1g}(1) (\text{MS}=-1)$ | -4.6-10.2i    | $^1T_{1g}(1) - ^3T_{1g}(1) (\text{MS}=0)$ | -0.0+0.4i   | $^1T_{1g}(1) - ^3T_{1g}(1) (\text{MS}=1)$ | -4.6+10.2i    |
| $^1T_{1g}(1) - ^3T_{1g}(2) (\text{MS}=-1)$ | -56.7-10.3i   | $^1T_{1g}(1) - ^3T_{1g}(2) (\text{MS}=0)$ | -0.0+0.8i   | $^1T_{1g}(1) - ^3T_{1g}(2) (\text{MS}=1)$ | -56.7+10.3i   |
| $^1T_{1g}(1) - ^3T_{1g}(3) (\text{MS}=-1)$ | +17.6-53.1i   | $^1T_{1g}(1) - ^3T_{1g}(3) (\text{MS}=0)$ | +0.0-77.1i  | $^1T_{1g}(1) - ^3T_{1g}(3) (\text{MS}=1)$ | +17.6+53.1i   |
| $^1T_{1g}(1) - ^3T_{2g}(1) (\text{MS}=-1)$ | +38.4+153.6i  | $^1T_{1g}(1) - ^3T_{2g}(1) (\text{MS}=0)$ | +0.0-199.3i | $^1T_{1g}(1) - ^3T_{2g}(1) (\text{MS}=1)$ | +38.4-153.6i  |
| $^1T_{1g}(1) - ^3T_{2g}(2) (\text{MS}=-1)$ | -144.3+139.5i | $^1T_{1g}(1) - ^3T_{2g}(2) (\text{MS}=0)$ | -0.0+196.7i | $^1T_{1g}(1) - ^3T_{2g}(2) (\text{MS}=1)$ | -144.3-139.5i |
| $^1T_{1g}(1) - ^3T_{2g}(3) (\text{MS}=-1)$ | -10.4+1.6i    | $^1T_{1g}(1) - ^3T_{2g}(3) (\text{MS}=0)$ | -0.0+36.9i  | $^1T_{1g}(1) - ^3T_{2g}(3) (\text{MS}=1)$ | -10.4+1.6i    |
| $^1T_{1g}(2) - ^3T_{1g}(1) (\text{MS}=-1)$ | +49.8-50.5i   | $^1T_{1g}(2) - ^3T_{1g}(1) (\text{MS}=0)$ | +0.0-71.8i  | $^1T_{1g}(2) - ^3T_{1g}(1) (\text{MS}=1)$ | +49.8+50.5i   |
| $^1T_{1g}(2) - ^3T_{1g}(2) (\text{MS}=-1)$ | -3.4-26.1i    | $^1T_{1g}(2) - ^3T_{1g}(2) (\text{MS}=0)$ | -0.0+61.1i  | $^1T_{1g}(2) - ^3T_{1g}(2) (\text{MS}=1)$ | -3.4+26.1i    |
| $^1T_{1g}(2) - ^3T_{1g}(3) (\text{MS}=-1)$ | +1.5-24.0i    | $^1T_{1g}(2) - ^3T_{1g}(3) (\text{MS}=0)$ | +0.0+43.0i  | $^1T_{1g}(2) - ^3T_{1g}(3) (\text{MS}=1)$ | +1.5+24.0i    |
| $^1T_{1g}(2) - ^3T_{2g}(1) (\text{MS}=-1)$ | +157.1+73.8i  | $^1T_{1g}(2) - ^3T_{2g}(1) (\text{MS}=0)$ | +0.0+165.2i | $^1T_{1g}(2) - ^3T_{2g}(1) (\text{MS}=1)$ | +157.1-73.8i  |
| $^1T_{1g}(2) - ^3T_{2g}(2) (\text{MS}=-1)$ | +32.9-44.2i   | $^1T_{1g}(2) - ^3T_{2g}(2) (\text{MS}=0)$ | +0.0+48.4i  | $^1T_{1g}(2) - ^3T_{2g}(2) (\text{MS}=1)$ | +32.9+44.2i   |
| $^1T_{1g}(2) - ^3T_{2g}(3) (\text{MS}=-1)$ | -110.0+136.1i | $^1T_{1g}(2) - ^3T_{2g}(3) (\text{MS}=0)$ | -0.0+206.3i | $^1T_{1g}(2) - ^3T_{2g}(3) (\text{MS}=1)$ | -110.0-136.1i |
| $^1T_{1g}(3) - ^3T_{1g}(1) (\text{MS}=-1)$ | +19.3+37.0i   | $^1T_{1g}(3) - ^3T_{1g}(1) (\text{MS}=0)$ | +0.0+34.8i  | $^1T_{1g}(3) - ^3T_{1g}(1) (\text{MS}=1)$ | +19.3-37.0i   |
| $^1T_{1g}(3) - ^3T_{1g}(2) (\text{MS}=-1)$ | -2.0+26.5i    | $^1T_{1g}(3) - ^3T_{1g}(2) (\text{MS}=0)$ | -0.0-46.9i  | $^1T_{1g}(3) - ^3T_{1g}(2) (\text{MS}=1)$ | -2.0-26.5i    |
| $^1T_{1g}(3) - ^3T_{1g}(3) (\text{MS}=-1)$ | +1.0-28.4i    | $^1T_{1g}(3) - ^3T_{1g}(3) (\text{MS}=0)$ | +0.0+39.7i  | $^1T_{1g}(3) - ^3T_{1g}(3) (\text{MS}=1)$ | +1.0+28.4i    |
| $^1T_{1g}(3) - ^3T_{2g}(1) (\text{MS}=-1)$ | -13.4+10.4i   | $^1T_{1g}(3) - ^3T_{2g}(1) (\text{MS}=0)$ | -0.0-41.8i  | $^1T_{1g}(3) - ^3T_{2g}(1) (\text{MS}=1)$ | -13.4-10.4i   |
| $^1T_{1g}(3) - ^3T_{2g}(2) (\text{MS}=-1)$ | +7.1-155.3i   | $^1T_{1g}(3) - ^3T_{2g}(2) (\text{MS}=0)$ | +0.0+202.6i | $^1T_{1g}(3) - ^3T_{2g}(2) (\text{MS}=1)$ | +7.1+155.3i   |
| $^1T_{1g}(3) - ^3T_{2g}(3) (\text{MS}=-1)$ | +204.7+60.8i  | $^1T_{1g}(3) - ^3T_{2g}(3) (\text{MS}=0)$ | +0.0+75.6i  | $^1T_{1g}(3) - ^3T_{2g}(3) (\text{MS}=1)$ | +204.7-60.8i  |

**Table 4** Triplet-triplet spin-orbit coupling in  $\text{cm}^{-1}$ .

| $n_{S,\alpha}-n'_{S'\alpha'}$               | $W^{SO}$     | $n_{S,\alpha}-n'_{S'\alpha'}$              | $W^{SO}$     |
|---------------------------------------------|--------------|--------------------------------------------|--------------|
| ${}^3T_{1g}(1)(MS=-1)-{}^3T_{1g}(2)(MS=-1)$ | +0.0+8.7i    | ${}^3T_{1g}(1)(MS=-1)-{}^3T_{1g}(2)(MS=0)$ | -109.4+9.2i  |
| ${}^3T_{1g}(1)(MS=0)-{}^3T_{1g}(2)(MS=-1)$  | +109.4+9.2i  | ${}^3T_{1g}(1)(MS=0)-{}^3T_{1g}(2)(MS=1)$  | -109.4+9.2i  |
| ${}^3T_{1g}(1)(MS=1)-{}^3T_{1g}(2)(MS=0)$   | +109.4+9.2i  | ${}^3T_{1g}(1)(MS=1)-{}^3T_{1g}(2)(MS=1)$  | +0.0-8.7i    |
| ${}^3T_{1g}(1)(MS=-1)-{}^3T_{1g}(3)(MS=-1)$ | -0.0-126.4i  | ${}^3T_{1g}(1)(MS=-1)-{}^3T_{1g}(3)(MS=0)$ | +32.7+105.6i |
| ${}^3T_{1g}(1)(MS=0)-{}^3T_{1g}(3)(MS=-1)$  | -32.7+105.6i | ${}^3T_{1g}(1)(MS=0)-{}^3T_{1g}(3)(MS=1)$  | +32.7+105.6i |
| ${}^3T_{1g}(1)(MS=1)-{}^3T_{1g}(3)(MS=0)$   | -32.7+105.6i | ${}^3T_{1g}(1)(MS=1)-{}^3T_{1g}(3)(MS=1)$  | -0.0+126.4i  |
| ${}^3T_{1g}(1)(MS=-1)-{}^3T_{2g}(1)(MS=-1)$ | -0.0-124.8i  | ${}^3T_{1g}(1)(MS=-1)-{}^3T_{2g}(1)(MS=0)$ | +21.1-103.2i |
| ${}^3T_{1g}(1)(MS=0)-{}^3T_{2g}(1)(MS=-1)$  | -21.1-103.2i | ${}^3T_{1g}(1)(MS=0)-{}^3T_{2g}(1)(MS=1)$  | +21.1-103.2i |
| ${}^3T_{1g}(1)(MS=1)-{}^3T_{2g}(1)(MS=0)$   | -21.1-103.2i | ${}^3T_{1g}(1)(MS=1)-{}^3T_{2g}(1)(MS=1)$  | -0.0+124.8i  |
| ${}^3T_{1g}(1)(MS=-1)-{}^3T_{2g}(2)(MS=-1)$ | +0.0+84.3i   | ${}^3T_{1g}(1)(MS=-1)-{}^3T_{2g}(2)(MS=0)$ | -51.1-48.8i  |
| ${}^3T_{1g}(1)(MS=0)-{}^3T_{2g}(2)(MS=-1)$  | +51.1-48.8i  | ${}^3T_{1g}(1)(MS=0)-{}^3T_{2g}(2)(MS=1)$  | -51.1-48.8i  |
| ${}^3T_{1g}(1)(MS=1)-{}^3T_{2g}(2)(MS=0)$   | +51.1-48.8i  | ${}^3T_{1g}(1)(MS=1)-{}^3T_{2g}(2)(MS=1)$  | +0.0-84.3i   |
| ${}^3T_{1g}(1)(MS=-1)-{}^3T_{2g}(3)(MS=-1)$ | -0.0+38.1i   | ${}^3T_{1g}(1)(MS=-1)-{}^3T_{2g}(3)(MS=0)$ | +6.6+4.2i    |
| ${}^3T_{1g}(1)(MS=0)-{}^3T_{2g}(3)(MS=-1)$  | -6.6+4.2i    | ${}^3T_{1g}(1)(MS=0)-{}^3T_{2g}(3)(MS=1)$  | +6.6+4.2i    |
| ${}^3T_{1g}(1)(MS=1)-{}^3T_{2g}(3)(MS=0)$   | -6.6+4.2i    | ${}^3T_{1g}(1)(MS=1)-{}^3T_{2g}(3)(MS=1)$  | -0.0-38.1i   |
| ${}^3T_{1g}(2)(MS=-1)-{}^3T_{1g}(3)(MS=-1)$ | -0.0+138.3i  | ${}^3T_{1g}(2)(MS=-1)-{}^3T_{1g}(3)(MS=0)$ | +0.6+71.4i   |
| ${}^3T_{1g}(2)(MS=0)-{}^3T_{1g}(3)(MS=-1)$  | -0.6+71.4i   | ${}^3T_{1g}(2)(MS=0)-{}^3T_{1g}(3)(MS=1)$  | +0.6+71.4i   |
| ${}^3T_{1g}(2)(MS=1)-{}^3T_{1g}(3)(MS=0)$   | -0.6+71.4i   | ${}^3T_{1g}(2)(MS=1)-{}^3T_{1g}(3)(MS=1)$  | -0.0-138.3i  |
| ${}^3T_{1g}(2)(MS=-1)-{}^3T_{2g}(1)(MS=-1)$ | -0.0+60.3i   | ${}^3T_{1g}(2)(MS=-1)-{}^3T_{2g}(1)(MS=0)$ | +51.7-18.3i  |
| ${}^3T_{1g}(2)(MS=0)-{}^3T_{2g}(1)(MS=-1)$  | -51.7-18.3i  | ${}^3T_{1g}(2)(MS=0)-{}^3T_{2g}(1)(MS=1)$  | +51.7-18.3i  |
| ${}^3T_{1g}(2)(MS=1)-{}^3T_{2g}(1)(MS=0)$   | -51.7-18.3i  | ${}^3T_{1g}(2)(MS=1)-{}^3T_{2g}(1)(MS=1)$  | -0.0-60.3i   |
| ${}^3T_{1g}(2)(MS=-1)-{}^3T_{2g}(2)(MS=-1)$ | -0.0+108.9i  | ${}^3T_{1g}(2)(MS=-1)-{}^3T_{2g}(2)(MS=0)$ | +18.9+91.1i  |
| ${}^3T_{1g}(2)(MS=0)-{}^3T_{2g}(2)(MS=-1)$  | -18.9+91.1i  | ${}^3T_{1g}(2)(MS=0)-{}^3T_{2g}(2)(MS=1)$  | +18.9+91.1i  |
| ${}^3T_{1g}(2)(MS=1)-{}^3T_{2g}(2)(MS=0)$   | -18.9+91.1i  | ${}^3T_{1g}(2)(MS=1)-{}^3T_{2g}(2)(MS=1)$  | -0.0-108.9i  |
| ${}^3T_{1g}(2)(MS=-1)-{}^3T_{2g}(3)(MS=-1)$ | -0.0+103.3i  | ${}^3T_{1g}(2)(MS=-1)-{}^3T_{2g}(3)(MS=0)$ | +63.0-73.9i  |
| ${}^3T_{1g}(2)(MS=0)-{}^3T_{2g}(3)(MS=-1)$  | -63.0-73.9i  | ${}^3T_{1g}(2)(MS=0)-{}^3T_{2g}(3)(MS=1)$  | +63.0-73.9i  |
| ${}^3T_{1g}(2)(MS=1)-{}^3T_{2g}(3)(MS=0)$   | -63.0-73.9i  | ${}^3T_{1g}(2)(MS=1)-{}^3T_{2g}(3)(MS=1)$  | -0.0-103.3i  |
| ${}^3T_{1g}(3)(MS=-1)-{}^3T_{2g}(1)(MS=-1)$ | +0.0-77.7i   | ${}^3T_{1g}(3)(MS=-1)-{}^3T_{2g}(1)(MS=0)$ | -84.8+28.7i  |
| ${}^3T_{1g}(3)(MS=0)-{}^3T_{2g}(1)(MS=-1)$  | +84.8+28.7i  | ${}^3T_{1g}(3)(MS=0)-{}^3T_{2g}(1)(MS=1)$  | -84.8+28.7i  |
| ${}^3T_{1g}(3)(MS=1)-{}^3T_{2g}(1)(MS=0)$   | +84.8+28.7i  | ${}^3T_{1g}(3)(MS=1)-{}^3T_{2g}(1)(MS=1)$  | +0.0+77.7i   |
| ${}^3T_{1g}(3)(MS=-1)-{}^3T_{2g}(2)(MS=-1)$ | +0.0+47.0i   | ${}^3T_{1g}(3)(MS=-1)-{}^3T_{2g}(2)(MS=0)$ | -8.4+40.4i   |
| ${}^3T_{1g}(3)(MS=0)-{}^3T_{2g}(2)(MS=-1)$  | +8.4+40.4i   | ${}^3T_{1g}(3)(MS=0)-{}^3T_{2g}(2)(MS=1)$  | -8.4+40.4i   |
| ${}^3T_{1g}(3)(MS=1)-{}^3T_{2g}(2)(MS=0)$   | +8.4+40.4i   | ${}^3T_{1g}(3)(MS=1)-{}^3T_{2g}(2)(MS=1)$  | +0.0-47.0i   |
| ${}^3T_{1g}(3)(MS=-1)-{}^3T_{2g}(3)(MS=-1)$ | -0.0-32.3i   | ${}^3T_{1g}(3)(MS=-1)-{}^3T_{2g}(3)(MS=0)$ | +107.7+13.8i |
| ${}^3T_{1g}(3)(MS=0)-{}^3T_{2g}(3)(MS=-1)$  | -107.7+13.8i | ${}^3T_{1g}(3)(MS=0)-{}^3T_{2g}(3)(MS=1)$  | +107.7+13.8i |
| ${}^3T_{1g}(3)(MS=1)-{}^3T_{2g}(3)(MS=0)$   | -107.7+13.8i | ${}^3T_{1g}(3)(MS=1)-{}^3T_{2g}(3)(MS=1)$  | -0.0+32.3i   |
| ${}^3T_{2g}(1)(MS=-1)-{}^3T_{2g}(2)(MS=-1)$ | +0.0-47.9i   | ${}^3T_{2g}(1)(MS=-1)-{}^3T_{2g}(2)(MS=0)$ | -88.3+25.9i  |
| ${}^3T_{2g}(1)(MS=0)-{}^3T_{2g}(2)(MS=-1)$  | +88.3+25.9i  | ${}^3T_{2g}(1)(MS=0)-{}^3T_{2g}(2)(MS=1)$  | -88.3+25.9i  |
| ${}^3T_{2g}(1)(MS=1)-{}^3T_{2g}(2)(MS=0)$   | +88.3+25.9i  | ${}^3T_{2g}(1)(MS=1)-{}^3T_{2g}(2)(MS=1)$  | +0.0+47.9i   |
| ${}^3T_{2g}(1)(MS=-1)-{}^3T_{2g}(3)(MS=-1)$ | +0.0-70.7i   | ${}^3T_{2g}(1)(MS=-1)-{}^3T_{2g}(3)(MS=0)$ | -2.1-74.7i   |
| ${}^3T_{2g}(1)(MS=0)-{}^3T_{2g}(3)(MS=-1)$  | +2.1-74.7i   | ${}^3T_{2g}(1)(MS=0)-{}^3T_{2g}(3)(MS=1)$  | -2.1-74.7i   |
| ${}^3T_{2g}(1)(MS=1)-{}^3T_{2g}(3)(MS=0)$   | +2.1-74.7i   | ${}^3T_{2g}(1)(MS=1)-{}^3T_{2g}(3)(MS=1)$  | +0.0+70.7i   |
| ${}^3T_{2g}(2)(MS=-1)-{}^3T_{2g}(3)(MS=-1)$ | -0.0-100.1i  | ${}^3T_{2g}(2)(MS=-1)-{}^3T_{2g}(3)(MS=0)$ | +56.5+49.2i  |
| ${}^3T_{2g}(2)(MS=0)-{}^3T_{2g}(3)(MS=-1)$  | -56.5+49.2i  | ${}^3T_{2g}(2)(MS=0)-{}^3T_{2g}(3)(MS=1)$  | +56.5+49.2i  |
| ${}^3T_{2g}(2)(MS=1)-{}^3T_{2g}(3)(MS=0)$   | -56.5+49.2i  | ${}^3T_{2g}(2)(MS=1)-{}^3T_{2g}(3)(MS=1)$  | -0.0+100.1i  |

**Table 5** Triplet-quintet spin-orbit coupling in  $\text{cm}^{-1}$ . (1/3)

| $n_{S,\alpha}-n'_{S'\alpha'}$               | $W^{SO}$      | $n_{S,\alpha}-n'_{S'\alpha'}$               | $W^{SO}$      |
|---------------------------------------------|---------------|---------------------------------------------|---------------|
| ${}^3T_{1g}(1)(MS=-1)-{}^5T_{2g}(1)(MS=-2)$ | -227.7+177.7i | ${}^3T_{1g}(1)(MS=-1)-{}^5T_{2g}(1)(MS=-1)$ | -0.0+247.4i   |
| ${}^3T_{1g}(1)(MS=-1)-{}^5T_{2g}(1)(MS=0)$  | -92.9-72.5i   | ${}^3T_{1g}(1)(MS=0)-{}^5T_{2g}(1)(MS=-1)$  | -161.0+125.6i |
| ${}^3T_{1g}(1)(MS=0)-{}^5T_{2g}(1)(MS=0)$   | -0.0+285.6i   | ${}^3T_{1g}(1)(MS=0)-{}^5T_{2g}(1)(MS=1)$   | -161.0-125.6i |
| ${}^3T_{1g}(1)(MS=1)-{}^5T_{2g}(1)(MS=0)$   | -92.9+72.5i   | ${}^3T_{1g}(1)(MS=1)-{}^5T_{2g}(1)(MS=1)$   | -0.0+247.4i   |
| ${}^3T_{1g}(1)(MS=1)-{}^5T_{2g}(1)(MS=2)$   | -227.7-177.7i | ${}^3T_{1g}(1)(MS=-1)-{}^5T_{2g}(2)(MS=-2)$ | +37.7+168.9i  |
| ${}^3T_{1g}(1)(MS=-1)-{}^5T_{2g}(2)(MS=-1)$ | +0.0-72.7i    | ${}^3T_{1g}(1)(MS=-1)-{}^5T_{2g}(2)(MS=0)$  | +15.4-69.0i   |
| ${}^3T_{1g}(1)(MS=0)-{}^5T_{2g}(2)(MS=-1)$  | +26.7+119.4i  | ${}^3T_{1g}(1)(MS=0)-{}^5T_{2g}(2)(MS=0)$   | +0.0-83.9i    |
| ${}^3T_{1g}(1)(MS=0)-{}^5T_{2g}(2)(MS=1)$   | +26.7-119.4i  | ${}^3T_{1g}(1)(MS=1)-{}^5T_{2g}(2)(MS=0)$   | +15.4+69.0i   |
| ${}^3T_{1g}(1)(MS=1)-{}^5T_{2g}(2)(MS=1)$   | +0.0-72.7i    | ${}^3T_{1g}(1)(MS=1)-{}^5T_{2g}(2)(MS=2)$   | +37.7-168.9i  |
| ${}^3T_{1g}(1)(MS=-1)-{}^5T_{2g}(3)(MS=-2)$ | +33.5+186.5i  | ${}^3T_{1g}(1)(MS=-1)-{}^5T_{2g}(3)(MS=-1)$ | +0.0-183.4i   |
| ${}^3T_{1g}(1)(MS=-1)-{}^5T_{2g}(3)(MS=0)$  | +13.7-76.2i   | ${}^3T_{1g}(1)(MS=0)-{}^5T_{2g}(3)(MS=-1)$  | +23.7+131.9i  |
| ${}^3T_{1g}(1)(MS=0)-{}^5T_{2g}(3)(MS=0)$   | +0.0-211.8i   | ${}^3T_{1g}(1)(MS=0)-{}^5T_{2g}(3)(MS=1)$   | +23.7-131.9i  |
| ${}^3T_{1g}(1)(MS=1)-{}^5T_{2g}(3)(MS=0)$   | +13.7+76.2i   | ${}^3T_{1g}(1)(MS=1)-{}^5T_{2g}(3)(MS=1)$   | +0.0-183.4i   |
| ${}^3T_{1g}(1)(MS=1)-{}^5T_{2g}(3)(MS=2)$   | +33.5-186.5i  | ${}^3T_{1g}(1)(MS=-1)-{}^5E_g(1)(MS=-2)$    | -6.4+0.2i     |
| ${}^3T_{1g}(1)(MS=-1)-{}^5E_g(1)(MS=-1)$    | -0.0+0.8i     | ${}^3T_{1g}(1)(MS=-1)-{}^5E_g(1)(MS=0)$     | -2.6-0.1i     |
| ${}^3T_{1g}(1)(MS=0)-{}^5E_g(1)(MS=-1)$     | -4.5+0.2i     | ${}^3T_{1g}(1)(MS=0)-{}^5E_g(1)(MS=0)$      | -0.0+0.9i     |
| ${}^3T_{1g}(1)(MS=0)-{}^5E_g(1)(MS=1)$      | -4.5-0.2i     | ${}^3T_{1g}(1)(MS=1)-{}^5E_g(1)(MS=0)$      | -2.6+0.1i     |
| ${}^3T_{1g}(1)(MS=1)-{}^5E_g(1)(MS=1)$      | -0.0+0.8i     | ${}^3T_{1g}(1)(MS=1)-{}^5E_g(1)(MS=2)$      | -6.4-0.2i     |
| ${}^3T_{1g}(1)(MS=-1)-{}^5E_g(2)(MS=-2)$    | -2.0-10.3i    | ${}^3T_{1g}(1)(MS=-1)-{}^5E_g(2)(MS=-1)$    | -0.0+7.3i     |
| ${}^3T_{1g}(1)(MS=-1)-{}^5E_g(2)(MS=0)$     | -0.8+4.2i     | ${}^3T_{1g}(1)(MS=0)-{}^5E_g(2)(MS=-1)$     | -1.4-7.3i     |
| ${}^3T_{1g}(1)(MS=0)-{}^5E_g(2)(MS=0)$      | -0.0+8.5i     | ${}^3T_{1g}(1)(MS=0)-{}^5E_g(2)(MS=1)$      | -1.4+7.3i     |
| ${}^3T_{1g}(1)(MS=1)-{}^5E_g(2)(MS=0)$      | -0.8-4.2i     | ${}^3T_{1g}(1)(MS=1)-{}^5E_g(2)(MS=1)$      | -0.0+7.3i     |
| ${}^3T_{1g}(1)(MS=1)-{}^5E_g(2)(MS=2)$      | -2.0+10.3i    | ${}^3T_{1g}(2)(MS=-1)-{}^5T_{2g}(1)(MS=-2)$ | +55.1-255.5i  |
| ${}^3T_{1g}(2)(MS=-1)-{}^5T_{2g}(1)(MS=-1)$ | +0.0+169.0i   | ${}^3T_{1g}(2)(MS=-1)-{}^5T_{2g}(1)(MS=0)$  | +22.5+104.3i  |
| ${}^3T_{1g}(2)(MS=0)-{}^5T_{2g}(1)(MS=-1)$  | +38.9-180.6i  | ${}^3T_{1g}(2)(MS=0)-{}^5T_{2g}(1)(MS=0)$   | +0.0+195.2i   |
| ${}^3T_{1g}(2)(MS=0)-{}^5T_{2g}(1)(MS=1)$   | +38.9+180.6i  | ${}^3T_{1g}(2)(MS=1)-{}^5T_{2g}(1)(MS=0)$   | +22.5-104.3i  |
| ${}^3T_{1g}(2)(MS=1)-{}^5T_{2g}(1)(MS=1)$   | +0.0+169.0i   | ${}^3T_{1g}(2)(MS=1)-{}^5T_{2g}(1)(MS=2)$   | +55.1+255.5i  |
| ${}^3T_{1g}(2)(MS=-1)-{}^5T_{2g}(2)(MS=-2)$ | +196.4+194.2i | ${}^3T_{1g}(2)(MS=-1)-{}^5T_{2g}(2)(MS=-1)$ | +0.0+238.1i   |
| ${}^3T_{1g}(2)(MS=-1)-{}^5T_{2g}(2)(MS=0)$  | +80.2-79.3i   | ${}^3T_{1g}(2)(MS=0)-{}^5T_{2g}(2)(MS=-1)$  | +138.9+137.3i |
| ${}^3T_{1g}(2)(MS=0)-{}^5T_{2g}(2)(MS=0)$   | +0.0+274.9i   | ${}^3T_{1g}(2)(MS=0)-{}^5T_{2g}(2)(MS=1)$   | +138.9-137.3i |
| ${}^3T_{1g}(2)(MS=1)-{}^5T_{2g}(2)(MS=0)$   | +80.2+79.3i   | ${}^3T_{1g}(2)(MS=1)-{}^5T_{2g}(2)(MS=1)$   | +0.0+238.1i   |
| ${}^3T_{1g}(2)(MS=1)-{}^5T_{2g}(2)(MS=2)$   | +196.4-194.2i | ${}^3T_{1g}(2)(MS=-1)-{}^5T_{2g}(3)(MS=-2)$ | +28.7-84.3i   |
| ${}^3T_{1g}(2)(MS=-1)-{}^5T_{2g}(3)(MS=-1)$ | +0.0-29.9i    | ${}^3T_{1g}(2)(MS=-1)-{}^5T_{2g}(3)(MS=0)$  | +11.7+34.4i   |
| ${}^3T_{1g}(2)(MS=0)-{}^5T_{2g}(3)(MS=-1)$  | +20.3-59.6i   | ${}^3T_{1g}(2)(MS=0)-{}^5T_{2g}(3)(MS=0)$   | +0.0-34.6i    |
| ${}^3T_{1g}(2)(MS=0)-{}^5T_{2g}(3)(MS=1)$   | +20.3+59.6i   | ${}^3T_{1g}(2)(MS=1)-{}^5T_{2g}(3)(MS=0)$   | +11.7-34.4i   |
| ${}^3T_{1g}(2)(MS=1)-{}^5T_{2g}(3)(MS=1)$   | +0.0-29.9i    | ${}^3T_{1g}(2)(MS=1)-{}^5T_{2g}(3)(MS=2)$   | +28.7+84.3i   |
| ${}^3T_{1g}(2)(MS=-1)-{}^5E_g(1)(MS=-2)$    | -0.6+1.4i     | ${}^3T_{1g}(2)(MS=-1)-{}^5E_g(1)(MS=-1)$    | -0.0-1.0i     |
| ${}^3T_{1g}(2)(MS=-1)-{}^5E_g(1)(MS=0)$     | -0.3-0.6i     | ${}^3T_{1g}(2)(MS=0)-{}^5E_g(1)(MS=-1)$     | -0.4+1.0i     |
| ${}^3T_{1g}(2)(MS=0)-{}^5E_g(1)(MS=0)$      | -0.0-1.2i     | ${}^3T_{1g}(2)(MS=0)-{}^5E_g(1)(MS=1)$      | -0.4-1.0i     |
| ${}^3T_{1g}(2)(MS=1)-{}^5E_g(1)(MS=0)$      | -0.3+0.6i     | ${}^3T_{1g}(2)(MS=1)-{}^5E_g(1)(MS=1)$      | -0.0-1.0i     |
| ${}^3T_{1g}(2)(MS=1)-{}^5E_g(1)(MS=2)$      | -0.6-1.4i     | ${}^3T_{1g}(2)(MS=-1)-{}^5E_g(2)(MS=-2)$    | -13.5+6.7i    |
| ${}^3T_{1g}(2)(MS=-1)-{}^5E_g(2)(MS=-1)$    | -0.0+3.0i     | ${}^3T_{1g}(2)(MS=-1)-{}^5E_g(2)(MS=0)$     | -5.5-2.7i     |
| ${}^3T_{1g}(2)(MS=0)-{}^5E_g(2)(MS=-1)$     | -9.6+4.8i     | ${}^3T_{1g}(2)(MS=0)-{}^5E_g(2)(MS=0)$      | -0.0+3.5i     |
| ${}^3T_{1g}(2)(MS=0)-{}^5E_g(2)(MS=1)$      | -9.6-4.8i     | ${}^3T_{1g}(2)(MS=1)-{}^5E_g(2)(MS=0)$      | -5.5+2.7i     |
| ${}^3T_{1g}(2)(MS=1)-{}^5E_g(2)(MS=1)$      | -0.0+3.0i     | ${}^3T_{1g}(2)(MS=1)-{}^5E_g(2)(MS=2)$      | -13.5-6.7i    |
| ${}^3T_{1g}(3)(MS=-1)-{}^5T_{2g}(1)(MS=-2)$ | -12.0-110.9i  | ${}^3T_{1g}(3)(MS=-1)-{}^5T_{2g}(1)(MS=-1)$ | -0.0+107.4i   |
| ${}^3T_{1g}(3)(MS=-1)-{}^5T_{2g}(1)(MS=0)$  | -4.9+45.3i    | ${}^3T_{1g}(3)(MS=0)-{}^5T_{2g}(1)(MS=-1)$  | -8.5-78.5i    |
| ${}^3T_{1g}(3)(MS=0)-{}^5T_{2g}(1)(MS=0)$   | -0.0+124.0i   | ${}^3T_{1g}(3)(MS=0)-{}^5T_{2g}(1)(MS=1)$   | -8.5+78.5i    |
| ${}^3T_{1g}(3)(MS=1)-{}^5T_{2g}(1)(MS=0)$   | -4.9-45.3i    | ${}^3T_{1g}(3)(MS=1)-{}^5T_{2g}(1)(MS=1)$   | -0.0+107.4i   |
| ${}^3T_{1g}(3)(MS=1)-{}^5T_{2g}(1)(MS=2)$   | -12.0+110.9i  | ${}^3T_{1g}(3)(MS=-1)-{}^5T_{2g}(2)(MS=-2)$ | +151.3-147.4i |
| ${}^3T_{1g}(3)(MS=-1)-{}^5T_{2g}(2)(MS=-1)$ | +0.0-196.9i   | ${}^3T_{1g}(3)(MS=-1)-{}^5T_{2g}(2)(MS=0)$  | +61.8+60.2i   |
| ${}^3T_{1g}(3)(MS=0)-{}^5T_{2g}(2)(MS=-1)$  | +107.0-104.2i | ${}^3T_{1g}(3)(MS=0)-{}^5T_{2g}(2)(MS=0)$   | +0.0-227.4i   |
| ${}^3T_{1g}(3)(MS=0)-{}^5T_{2g}(2)(MS=1)$   | +107.0+104.2i | ${}^3T_{1g}(3)(MS=1)-{}^5T_{2g}(2)(MS=0)$   | +61.8-60.2i   |
| ${}^3T_{1g}(3)(MS=1)-{}^5T_{2g}(2)(MS=1)$   | +0.0-196.9i   | ${}^3T_{1g}(3)(MS=1)-{}^5T_{2g}(2)(MS=2)$   | +151.3+147.4i |
| ${}^3T_{1g}(3)(MS=-1)-{}^5T_{2g}(3)(MS=-2)$ | -371.2-20.3i  | ${}^3T_{1g}(3)(MS=-1)-{}^5T_{2g}(3)(MS=-1)$ | -0.0-53.1i    |
| ${}^3T_{1g}(3)(MS=-1)-{}^5T_{2g}(3)(MS=0)$  | -151.5+8.3i   | ${}^3T_{1g}(3)(MS=0)-{}^5T_{2g}(3)(MS=-1)$  | -262.5-14.4i  |
| ${}^3T_{1g}(3)(MS=0)-{}^5T_{2g}(3)(MS=0)$   | -0.0-61.3i    | ${}^3T_{1g}(3)(MS=0)-{}^5T_{2g}(3)(MS=1)$   | -262.5+14.4i  |
| ${}^3T_{1g}(3)(MS=1)-{}^5T_{2g}(3)(MS=0)$   | -151.5-8.3i   | ${}^3T_{1g}(3)(MS=1)-{}^5T_{2g}(3)(MS=1)$   | -0.0-53.1i    |

**Table 6** Triplet-quintet spin-orbit coupling in  $\text{cm}^{-1}$ . (2/3)

| $nS, \alpha - n'S' \alpha'$               | $W^{SO}$     | $nS, \alpha - n'S' \alpha'$               | $W^{SO}$     |
|-------------------------------------------|--------------|-------------------------------------------|--------------|
| $^3T_{1g}(3)(MS=1) - ^5T_{2g}(3)(MS=2)$   | -371.2+20.3i | $^3T_{1g}(3)(MS=-1) - ^5E_g(1)(MS=-2)$    | +0.4-3.2i    |
| $^3T_{1g}(3)(MS=-1) - ^5E_g(1)(MS=-1)$    | +0.0+5.2i    | $^3T_{1g}(3)(MS=-1) - ^5E_g(1)(MS=0)$     | +0.2+1.3i    |
| $^3T_{1g}(3)(MS=0) - ^5E_g(1)(MS=-1)$     | +0.3-2.3i    | $^3T_{1g}(3)(MS=0) - ^5E_g(1)(MS=0)$      | +0.0+6.0i    |
| $^3T_{1g}(3)(MS=0) - ^5E_g(1)(MS=1)$      | +0.3+2.3i    | $^3T_{1g}(3)(MS=1) - ^5E_g(1)(MS=0)$      | +0.2-1.3i    |
| $^3T_{1g}(3)(MS=1) - ^5E_g(1)(MS=1)$      | +0.0+5.2i    | $^3T_{1g}(3)(MS=1) - ^5E_g(1)(MS=2)$      | +0.4+3.2i    |
| $^3T_{1g}(3)(MS=-1) - ^5E_g(2)(MS=-2)$    | +19.1+10.9i  | $^3T_{1g}(3)(MS=-1) - ^5E_g(2)(MS=-1)$    | +0.0+11.7i   |
| $^3T_{1g}(3)(MS=-1) - ^5E_g(2)(MS=0)$     | +7.8-4.5i    | $^3T_{1g}(3)(MS=0) - ^5E_g(2)(MS=-1)$     | +13.5+7.7i   |
| $^3T_{1g}(3)(MS=0) - ^5E_g(2)(MS=0)$      | +0.0+13.5i   | $^3T_{1g}(3)(MS=0) - ^5E_g(2)(MS=1)$      | +13.5-7.7i   |
| $^3T_{1g}(3)(MS=1) - ^5E_g(2)(MS=0)$      | +7.8+4.5i    | $^3T_{1g}(3)(MS=1) - ^5E_g(2)(MS=1)$      | +0.0+11.7i   |
| $^3T_{1g}(3)(MS=1) - ^5E_g(2)(MS=2)$      | +19.1-10.9i  | $^3T_{2g}(1)(MS=-1) - ^5T_{2g}(1)(MS=-2)$ | +170.1+78.5i |
| $^3T_{2g}(1)(MS=-1) - ^5T_{2g}(1)(MS=-1)$ | +0.0+96.6i   | $^3T_{2g}(1)(MS=-1) - ^5T_{2g}(1)(MS=0)$  | +69.4-32.0i  |
| $^3T_{2g}(1)(MS=0) - ^5T_{2g}(1)(MS=-1)$  | +120.2+55.5i | $^3T_{2g}(1)(MS=0) - ^5T_{2g}(1)(MS=0)$   | +0.0+111.6i  |
| $^3T_{2g}(1)(MS=0) - ^5T_{2g}(1)(MS=1)$   | +120.2-55.5i | $^3T_{2g}(1)(MS=1) - ^5T_{2g}(1)(MS=0)$   | +69.4+32.0i  |
| $^3T_{2g}(1)(MS=1) - ^5T_{2g}(1)(MS=1)$   | +0.0+96.6i   | $^3T_{2g}(1)(MS=1) - ^5T_{2g}(1)(MS=2)$   | +170.1-78.5i |
| $^3T_{2g}(1)(MS=-1) - ^5T_{2g}(2)(MS=-2)$ | +12.8-127.3i | $^3T_{2g}(1)(MS=-1) - ^5T_{2g}(2)(MS=-1)$ | +0.0+92.8i   |
| $^3T_{2g}(1)(MS=-1) - ^5T_{2g}(2)(MS=0)$  | +5.2+52.0i   | $^3T_{2g}(1)(MS=0) - ^5T_{2g}(2)(MS=-1)$  | +9.1-90.0i   |
| $^3T_{2g}(1)(MS=0) - ^5T_{2g}(2)(MS=0)$   | +0.0+107.1i  | $^3T_{2g}(1)(MS=0) - ^5T_{2g}(2)(MS=1)$   | +9.1+90.0i   |
| $^3T_{2g}(1)(MS=1) - ^5T_{2g}(2)(MS=0)$   | +5.2-52.0i   | $^3T_{2g}(1)(MS=1) - ^5T_{2g}(2)(MS=1)$   | +0.0+92.8i   |
| $^3T_{2g}(1)(MS=1) - ^5T_{2g}(2)(MS=2)$   | +12.8+127.3i | $^3T_{2g}(1)(MS=-1) - ^5T_{2g}(3)(MS=-2)$ | +7.6+122.7i  |
| $^3T_{2g}(1)(MS=-1) - ^5T_{2g}(3)(MS=-1)$ | +0.0-81.4i   | $^3T_{2g}(1)(MS=-1) - ^5T_{2g}(3)(MS=0)$  | +3.1-50.1i   |
| $^3T_{2g}(1)(MS=0) - ^5T_{2g}(3)(MS=-1)$  | +5.4+86.7i   | $^3T_{2g}(1)(MS=0) - ^5T_{2g}(3)(MS=0)$   | +0.0-94.0i   |
| $^3T_{2g}(1)(MS=0) - ^5T_{2g}(3)(MS=1)$   | +5.4-86.7i   | $^3T_{2g}(1)(MS=1) - ^5T_{2g}(3)(MS=0)$   | +3.1+50.1i   |
| $^3T_{2g}(1)(MS=1) - ^5T_{2g}(3)(MS=1)$   | +0.0-81.4i   | $^3T_{2g}(1)(MS=1) - ^5T_{2g}(3)(MS=2)$   | +7.6-122.7i  |
| $^3T_{2g}(1)(MS=-1) - ^5E_g(1)(MS=-2)$    | +54.3-47.1i  | $^3T_{2g}(1)(MS=-1) - ^5E_g(1)(MS=-1)$    | +0.0-45.3i   |
| $^3T_{2g}(1)(MS=-1) - ^5E_g(1)(MS=0)$     | +22.2+19.2i  | $^3T_{2g}(1)(MS=0) - ^5E_g(1)(MS=-1)$     | +38.4-33.3i  |
| $^3T_{2g}(1)(MS=0) - ^5E_g(1)(MS=0)$      | +0.0-52.3i   | $^3T_{2g}(1)(MS=0) - ^5E_g(1)(MS=1)$      | +38.4+33.3i  |
| $^3T_{2g}(1)(MS=1) - ^5E_g(1)(MS=0)$      | +22.2-19.2i  | $^3T_{2g}(1)(MS=1) - ^5E_g(1)(MS=1)$      | +0.0-45.3i   |
| $^3T_{2g}(1)(MS=1) - ^5E_g(1)(MS=2)$      | +54.3+47.1i  | $^3T_{2g}(1)(MS=-1) - ^5E_g(2)(MS=-2)$    | +0.3-3.1i    |
| $^3T_{2g}(1)(MS=-1) - ^5E_g(2)(MS=-1)$    | +0.0+14.5i   | $^3T_{2g}(1)(MS=-1) - ^5E_g(2)(MS=0)$     | +0.1+1.3i    |
| $^3T_{2g}(1)(MS=0) - ^5E_g(2)(MS=-1)$     | +0.2-2.2i    | $^3T_{2g}(1)(MS=0) - ^5E_g(2)(MS=0)$      | +0.0+16.8i   |
| $^3T_{2g}(1)(MS=0) - ^5E_g(2)(MS=1)$      | +0.2+2.2i    | $^3T_{2g}(1)(MS=1) - ^5E_g(2)(MS=0)$      | +0.1-1.3i    |
| $^3T_{2g}(1)(MS=1) - ^5E_g(2)(MS=1)$      | +0.0+14.5i   | $^3T_{2g}(1)(MS=1) - ^5E_g(2)(MS=2)$      | +0.3+3.1i    |
| $^3T_{2g}(2)(MS=-1) - ^5T_{2g}(1)(MS=-2)$ | +10.2-7.3i   | $^3T_{2g}(2)(MS=-1) - ^5T_{2g}(1)(MS=-1)$ | +0.0+17.6i   |
| $^3T_{2g}(2)(MS=-1) - ^5T_{2g}(1)(MS=0)$  | +4.2+3.0i    | $^3T_{2g}(2)(MS=0) - ^5T_{2g}(1)(MS=-1)$  | +7.2-5.2i    |
| $^3T_{2g}(2)(MS=0) - ^5T_{2g}(1)(MS=0)$   | +0.0+20.4i   | $^3T_{2g}(2)(MS=0) - ^5T_{2g}(1)(MS=1)$   | +7.2+5.2i    |
| $^3T_{2g}(2)(MS=1) - ^5T_{2g}(1)(MS=0)$   | +4.2-3.0i    | $^3T_{2g}(2)(MS=1) - ^5T_{2g}(1)(MS=1)$   | +0.0+17.6i   |
| $^3T_{2g}(2)(MS=1) - ^5T_{2g}(1)(MS=2)$   | +10.2+7.3i   | $^3T_{2g}(2)(MS=-1) - ^5T_{2g}(2)(MS=-2)$ | -183.0+51.4i |
| $^3T_{2g}(2)(MS=-1) - ^5T_{2g}(2)(MS=-1)$ | -0.0+74.1i   | $^3T_{2g}(2)(MS=-1) - ^5T_{2g}(2)(MS=0)$  | -74.7-21.0i  |
| $^3T_{2g}(2)(MS=0) - ^5T_{2g}(2)(MS=-1)$  | -129.4+36.3i | $^3T_{2g}(2)(MS=0) - ^5T_{2g}(2)(MS=0)$   | -0.0+85.6i   |
| $^3T_{2g}(2)(MS=0) - ^5T_{2g}(2)(MS=1)$   | -129.4-36.3i | $^3T_{2g}(2)(MS=1) - ^5T_{2g}(2)(MS=0)$   | -74.7+21.0i  |
| $^3T_{2g}(2)(MS=1) - ^5T_{2g}(2)(MS=1)$   | -0.0+74.1i   | $^3T_{2g}(2)(MS=1) - ^5T_{2g}(2)(MS=2)$   | -183.0-51.4i |
| $^3T_{2g}(2)(MS=-1) - ^5T_{2g}(3)(MS=-2)$ | -92.6-114.4i | $^3T_{2g}(2)(MS=-1) - ^5T_{2g}(3)(MS=-1)$ | -0.0-166.8i  |
| $^3T_{2g}(2)(MS=-1) - ^5T_{2g}(3)(MS=0)$  | -37.8+46.7i  | $^3T_{2g}(2)(MS=0) - ^5T_{2g}(3)(MS=-1)$  | -65.5-80.9i  |
| $^3T_{2g}(2)(MS=0) - ^5T_{2g}(3)(MS=0)$   | -0.0-192.7i  | $^3T_{2g}(2)(MS=0) - ^5T_{2g}(3)(MS=1)$   | -65.5+80.9i  |
| $^3T_{2g}(2)(MS=1) - ^5T_{2g}(3)(MS=0)$   | -37.8-46.7i  | $^3T_{2g}(2)(MS=1) - ^5T_{2g}(3)(MS=1)$   | -0.0-166.8i  |
| $^3T_{2g}(2)(MS=1) - ^5T_{2g}(3)(MS=2)$   | -92.6+114.4i | $^3T_{2g}(2)(MS=-1) - ^5E_g(1)(MS=-2)$    | +1.8+19.7i   |
| $^3T_{2g}(2)(MS=-1) - ^5E_g(1)(MS=-1)$    | +0.0-31.2i   | $^3T_{2g}(2)(MS=-1) - ^5E_g(1)(MS=0)$     | +0.7-8.1i    |
| $^3T_{2g}(2)(MS=0) - ^5E_g(1)(MS=-1)$     | +1.2+14.0i   | $^3T_{2g}(2)(MS=0) - ^5E_g(1)(MS=0)$      | +0.0-36.0i   |
| $^3T_{2g}(2)(MS=0) - ^5E_g(1)(MS=1)$      | +1.2-14.0i   | $^3T_{2g}(2)(MS=1) - ^5E_g(1)(MS=0)$      | +0.7+8.1i    |
| $^3T_{2g}(2)(MS=1) - ^5E_g(1)(MS=1)$      | +0.0-31.2i   | $^3T_{2g}(2)(MS=1) - ^5E_g(1)(MS=2)$      | +1.8-19.7i   |
| $^3T_{2g}(2)(MS=-1) - ^5E_g(2)(MS=-2)$    | -60.9-32.8i  | $^3T_{2g}(2)(MS=-1) - ^5E_g(2)(MS=-1)$    | -0.0-22.8i   |
| $^3T_{2g}(2)(MS=-1) - ^5E_g(2)(MS=0)$     | -24.8+13.4i  | $^3T_{2g}(2)(MS=0) - ^5E_g(2)(MS=-1)$     | -43.0-23.2i  |
| $^3T_{2g}(2)(MS=0) - ^5E_g(2)(MS=0)$      | -0.0-26.4i   | $^3T_{2g}(2)(MS=0) - ^5E_g(2)(MS=1)$      | -43.0+23.2i  |
| $^3T_{2g}(2)(MS=1) - ^5E_g(2)(MS=0)$      | -24.8-13.4i  | $^3T_{2g}(2)(MS=1) - ^5E_g(2)(MS=1)$      | -0.0-22.8i   |
| $^3T_{2g}(2)(MS=1) - ^5E_g(2)(MS=2)$      | -60.9+32.8i  | $^3T_{2g}(3)(MS=-1) - ^5T_{2g}(1)(MS=-2)$ | +87.9-96.8i  |
| $^3T_{2g}(3)(MS=-1) - ^5T_{2g}(1)(MS=-1)$ | +0.0-127.8i  | $^3T_{2g}(3)(MS=-1) - ^5T_{2g}(1)(MS=0)$  | +35.9+39.5i  |
| $^3T_{2g}(3)(MS=0) - ^5T_{2g}(1)(MS=-1)$  | +62.2-68.4i  | $^3T_{2g}(3)(MS=0) - ^5T_{2g}(1)(MS=0)$   | +0.0-147.6i  |

**Table 7** Triplet-quintet spin-orbit coupling in  $\text{cm}^{-1}$ . (3/3)

| $nS, \alpha - n'S' \alpha'$                   | $W^{SO}$    | $nS, \alpha - n'S' \alpha'$                   | $W^{SO}$    |
|-----------------------------------------------|-------------|-----------------------------------------------|-------------|
| ${}^3T_{2g}(3)(MS=0) - {}^5T_{2g}(1)(MS=1)$   | +62.2+68.4i | ${}^3T_{2g}(3)(MS=1) - {}^5T_{2g}(1)(MS=0)$   | +35.9-39.5i |
| ${}^3T_{2g}(3)(MS=1) - {}^5T_{2g}(1)(MS=1)$   | +0.0-127.8i | ${}^3T_{2g}(3)(MS=1) - {}^5T_{2g}(1)(MS=2)$   | +87.9+96.8i |
| ${}^3T_{2g}(3)(MS=-1) - {}^5T_{2g}(2)(MS=-2)$ | +2.4+103.5i | ${}^3T_{2g}(3)(MS=-1) - {}^5T_{2g}(2)(MS=-1)$ | +0.0-87.2i  |
| ${}^3T_{2g}(3)(MS=-1) - {}^5T_{2g}(2)(MS=0)$  | +1.0-42.3i  | ${}^3T_{2g}(3)(MS=0) - {}^5T_{2g}(2)(MS=-1)$  | +1.7+73.2i  |
| ${}^3T_{2g}(3)(MS=0) - {}^5T_{2g}(2)(MS=0)$   | +0.0-100.7i | ${}^3T_{2g}(3)(MS=0) - {}^5T_{2g}(2)(MS=1)$   | +1.7-73.2i  |
| ${}^3T_{2g}(3)(MS=1) - {}^5T_{2g}(2)(MS=0)$   | +1.0+42.3i  | ${}^3T_{2g}(3)(MS=1) - {}^5T_{2g}(2)(MS=1)$   | +0.0-87.2i  |
| ${}^3T_{2g}(3)(MS=1) - {}^5T_{2g}(2)(MS=2)$   | +2.4-103.5i | ${}^3T_{2g}(3)(MS=-1) - {}^5T_{2g}(3)(MS=-2)$ | +1.4+141.9i |
| ${}^3T_{2g}(3)(MS=-1) - {}^5T_{2g}(3)(MS=-1)$ | +0.0-110.0i | ${}^3T_{2g}(3)(MS=-1) - {}^5T_{2g}(3)(MS=0)$  | +0.6-57.9i  |
| ${}^3T_{2g}(3)(MS=0) - {}^5T_{2g}(3)(MS=-1)$  | +1.0+100.3i | ${}^3T_{2g}(3)(MS=0) - {}^5T_{2g}(3)(MS=0)$   | +0.0-127.0i |
| ${}^3T_{2g}(3)(MS=0) - {}^5T_{2g}(3)(MS=1)$   | +1.0-100.3i | ${}^3T_{2g}(3)(MS=1) - {}^5T_{2g}(3)(MS=0)$   | +0.6+57.9i  |
| ${}^3T_{2g}(3)(MS=1) - {}^5T_{2g}(3)(MS=1)$   | +0.0-110.0i | ${}^3T_{2g}(3)(MS=1) - {}^5T_{2g}(3)(MS=2)$   | +1.4-141.9i |
| ${}^3T_{2g}(3)(MS=-1) - {}^5E_g(1)(MS=-2)$    | +24.6+10.8i | ${}^3T_{2g}(3)(MS=-1) - {}^5E_g(1)(MS=-1)$    | +0.0+28.5i  |
| ${}^3T_{2g}(3)(MS=-1) - {}^5E_g(1)(MS=0)$     | +10.1-4.4i  | ${}^3T_{2g}(3)(MS=0) - {}^5E_g(1)(MS=-1)$     | +17.4+7.6i  |
| ${}^3T_{2g}(3)(MS=0) - {}^5E_g(1)(MS=0)$      | +0.0+32.9i  | ${}^3T_{2g}(3)(MS=0) - {}^5E_g(1)(MS=1)$      | +17.4-7.6i  |
| ${}^3T_{2g}(3)(MS=1) - {}^5E_g(1)(MS=0)$      | +10.1+4.4i  | ${}^3T_{2g}(3)(MS=1) - {}^5E_g(1)(MS=1)$      | +0.0+28.5i  |
| ${}^3T_{2g}(3)(MS=1) - {}^5E_g(1)(MS=2)$      | +24.6-10.8i | ${}^3T_{2g}(3)(MS=-1) - {}^5E_g(2)(MS=-2)$    | +1.8-77.3i  |
| ${}^3T_{2g}(3)(MS=-1) - {}^5E_g(2)(MS=-1)$    | +0.0+66.2i  | ${}^3T_{2g}(3)(MS=-1) - {}^5E_g(2)(MS=0)$     | +0.7+31.5i  |
| ${}^3T_{2g}(3)(MS=0) - {}^5E_g(2)(MS=-1)$     | +1.3-54.6i  | ${}^3T_{2g}(3)(MS=0) - {}^5E_g(2)(MS=0)$      | +0.0+76.4i  |
| ${}^3T_{2g}(3)(MS=0) - {}^5E_g(2)(MS=1)$      | +1.3+54.6i  | ${}^3T_{2g}(3)(MS=1) - {}^5E_g(2)(MS=0)$      | +0.7-31.5i  |
| ${}^3T_{2g}(3)(MS=1) - {}^5E_g(2)(MS=1)$      | +0.0+66.2i  | ${}^3T_{2g}(3)(MS=1) - {}^5E_g(2)(MS=2)$      | +1.8+77.3i  |

**Table 8** Quintet-quintet spin-orbit coupling in  $\text{cm}^{-1}$ . (1/2)

| $nS, \alpha - n'S' \alpha'$                   | $W^{SO}$      | $nS, \alpha - n'S' \alpha'$                   | $W^{SO}$      |
|-----------------------------------------------|---------------|-----------------------------------------------|---------------|
| ${}^5T_{2g}(1)(MS=-2) - {}^5T_{2g}(2)(MS=-2)$ | +0.0+63.0i    | ${}^5T_{2g}(1)(MS=-2) - {}^5T_{2g}(2)(MS=-1)$ | -81.7-22.4i   |
| ${}^5T_{2g}(1)(MS=-1) - {}^5T_{2g}(2)(MS=-2)$ | +81.7-22.4i   | ${}^5T_{2g}(1)(MS=-1) - {}^5T_{2g}(2)(MS=-1)$ | +0.0+31.5i    |
| ${}^5T_{2g}(1)(MS=-1) - {}^5T_{2g}(2)(MS=0)$  | -100.1-27.5i  | ${}^5T_{2g}(1)(MS=0) - {}^5T_{2g}(2)(MS=-1)$  | +100.1-27.5i  |
| ${}^5T_{2g}(1)(MS=0) - {}^5T_{2g}(2)(MS=1)$   | -100.1-27.5i  | ${}^5T_{2g}(1)(MS=1) - {}^5T_{2g}(2)(MS=0)$   | +100.1-27.5i  |
| ${}^5T_{2g}(1)(MS=1) - {}^5T_{2g}(2)(MS=1)$   | +0.0-31.5i    | ${}^5T_{2g}(1)(MS=1) - {}^5T_{2g}(2)(MS=2)$   | -81.7-22.4i   |
| ${}^5T_{2g}(1)(MS=2) - {}^5T_{2g}(2)(MS=1)$   | +81.7-22.4i   | ${}^5T_{2g}(1)(MS=2) - {}^5T_{2g}(2)(MS=2)$   | +0.0-63.0i    |
| ${}^5T_{2g}(1)(MS=-2) - {}^5T_{2g}(3)(MS=-2)$ | +0.0-128.1i   | ${}^5T_{2g}(1)(MS=-2) - {}^5T_{2g}(3)(MS=-1)$ | -29.0+47.1i   |
| ${}^5T_{2g}(1)(MS=-1) - {}^5T_{2g}(3)(MS=-2)$ | +29.0+47.1i   | ${}^5T_{2g}(1)(MS=-1) - {}^5T_{2g}(3)(MS=-1)$ | +0.0-64.1i    |
| ${}^5T_{2g}(1)(MS=-1) - {}^5T_{2g}(3)(MS=0)$  | -35.5+57.7i   | ${}^5T_{2g}(1)(MS=0) - {}^5T_{2g}(3)(MS=-1)$  | +35.5+57.7i   |
| ${}^5T_{2g}(1)(MS=0) - {}^5T_{2g}(3)(MS=1)$   | -35.5+57.7i   | ${}^5T_{2g}(1)(MS=1) - {}^5T_{2g}(3)(MS=0)$   | +35.5+57.7i   |
| ${}^5T_{2g}(1)(MS=1) - {}^5T_{2g}(3)(MS=1)$   | +0.0+64.1i    | ${}^5T_{2g}(1)(MS=1) - {}^5T_{2g}(3)(MS=2)$   | -29.0+47.1i   |
| ${}^5T_{2g}(1)(MS=2) - {}^5T_{2g}(3)(MS=1)$   | +29.0+47.1i   | ${}^5T_{2g}(1)(MS=2) - {}^5T_{2g}(3)(MS=2)$   | +0.0+128.1i   |
| ${}^5T_{2g}(1)(MS=-2) - {}^5E_g(1)(MS=-2)$    | -0.0+151.9i   | ${}^5T_{2g}(1)(MS=-2) - {}^5E_g(1)(MS=-1)$    | +6.2+65.9i    |
| ${}^5T_{2g}(1)(MS=-1) - {}^5E_g(1)(MS=-2)$    | -6.2+65.9i    | ${}^5T_{2g}(1)(MS=-1) - {}^5E_g(1)(MS=-1)$    | -0.0+75.9i    |
| ${}^5T_{2g}(1)(MS=-1) - {}^5E_g(1)(MS=0)$     | +7.6+80.7i    | ${}^5T_{2g}(1)(MS=0) - {}^5E_g(1)(MS=-1)$     | -7.6+80.7i    |
| ${}^5T_{2g}(1)(MS=0) - {}^5E_g(1)(MS=1)$      | +7.6+80.7i    | ${}^5T_{2g}(1)(MS=1) - {}^5E_g(1)(MS=0)$      | -7.6+80.7i    |
| ${}^5T_{2g}(1)(MS=1) - {}^5E_g(1)(MS=1)$      | -0.0-75.9i    | ${}^5T_{2g}(1)(MS=1) - {}^5E_g(1)(MS=2)$      | +6.2+65.9i    |
| ${}^5T_{2g}(1)(MS=2) - {}^5E_g(1)(MS=1)$      | -6.2+65.9i    | ${}^5T_{2g}(1)(MS=2) - {}^5E_g(1)(MS=2)$      | -0.0-151.9i   |
| ${}^5T_{2g}(1)(MS=-2) - {}^5E_g(2)(MS=-2)$    | -0.0+137.1i   | ${}^5T_{2g}(1)(MS=-2) - {}^5E_g(2)(MS=-1)$    | +147.1-81.9i  |
| ${}^5T_{2g}(1)(MS=-1) - {}^5E_g(2)(MS=-2)$    | -147.1-81.9i  | ${}^5T_{2g}(1)(MS=-1) - {}^5E_g(2)(MS=-1)$    | -0.0+68.6i    |
| ${}^5T_{2g}(1)(MS=-1) - {}^5E_g(2)(MS=0)$     | +180.1-100.3i | ${}^5T_{2g}(1)(MS=0) - {}^5E_g(2)(MS=-1)$     | -180.1-100.3i |
| ${}^5T_{2g}(1)(MS=0) - {}^5E_g(2)(MS=1)$      | +180.1-100.3i | ${}^5T_{2g}(1)(MS=1) - {}^5E_g(2)(MS=0)$      | -180.1-100.3i |
| ${}^5T_{2g}(1)(MS=1) - {}^5E_g(2)(MS=1)$      | -0.0-68.6i    | ${}^5T_{2g}(1)(MS=1) - {}^5E_g(2)(MS=2)$      | +147.1-81.9i  |
| ${}^5T_{2g}(1)(MS=2) - {}^5E_g(2)(MS=1)$      | -147.1-81.9i  | ${}^5T_{2g}(1)(MS=2) - {}^5E_g(2)(MS=2)$      | -0.0-137.1i   |
| ${}^5T_{2g}(2)(MS=-2) - {}^5T_{2g}(3)(MS=-2)$ | -0.0-138.2i   | ${}^5T_{2g}(2)(MS=-2) - {}^5T_{2g}(3)(MS=-1)$ | +1.0-83.4i    |
| ${}^5T_{2g}(2)(MS=-1) - {}^5T_{2g}(3)(MS=-2)$ | -1.0-83.4i    | ${}^5T_{2g}(2)(MS=-1) - {}^5T_{2g}(3)(MS=-1)$ | -0.0-69.1i    |
| ${}^5T_{2g}(2)(MS=-1) - {}^5T_{2g}(3)(MS=0)$  | +1.2-102.1i   | ${}^5T_{2g}(2)(MS=0) - {}^5T_{2g}(3)(MS=-1)$  | -1.2-102.1i   |
| ${}^5T_{2g}(2)(MS=0) - {}^5T_{2g}(3)(MS=1)$   | +1.2-102.1i   | ${}^5T_{2g}(2)(MS=1) - {}^5T_{2g}(3)(MS=0)$   | -1.2-102.1i   |



**Table 9** Quintet-quintet spin-orbit coupling in  $\text{cm}^{-1}$ . (2/2)

| $n_{S,\alpha} \cdot n'_{S'\alpha'}$             | $W^{SO}$     | $n_{S,\alpha} \cdot n'_{S'\alpha'}$             | $W^{SO}$     |
|-------------------------------------------------|--------------|-------------------------------------------------|--------------|
| ${}^5T_{2g}(2)(MS=1) \cdot {}^5T_{2g}(3)(MS=1)$ | -0.0+69.1i   | ${}^5T_{2g}(2)(MS=1) \cdot {}^5T_{2g}(3)(MS=2)$ | +1.0-83.4i   |
| ${}^5T_{2g}(2)(MS=2) \cdot {}^5T_{2g}(3)(MS=1)$ | -1.0-83.4i   | ${}^5T_{2g}(2)(MS=2) \cdot {}^5T_{2g}(3)(MS=2)$ | -0.0+138.2i  |
| ${}^5T_{2g}(2)(MS=-2) \cdot {}^5E_g(1)(MS=-2)$  | +0.0+28.6i   | ${}^5T_{2g}(2)(MS=-2) \cdot {}^5E_g(1)(MS=-1)$  | -130.7-36.8i |
| ${}^5T_{2g}(2)(MS=-1) \cdot {}^5E_g(1)(MS=-2)$  | +130.7-36.8i | ${}^5T_{2g}(2)(MS=-1) \cdot {}^5E_g(1)(MS=-1)$  | +0.0+14.3i   |
| ${}^5T_{2g}(2)(MS=-1) \cdot {}^5E_g(1)(MS=0)$   | -160.0-45.1i | ${}^5T_{2g}(2)(MS=0) \cdot {}^5E_g(1)(MS=-1)$   | +160.0-45.1i |
| ${}^5T_{2g}(2)(MS=0) \cdot {}^5E_g(1)(MS=1)$    | -160.0-45.1i | ${}^5T_{2g}(2)(MS=1) \cdot {}^5E_g(1)(MS=0)$    | +160.0-45.1i |
| ${}^5T_{2g}(2)(MS=1) \cdot {}^5E_g(1)(MS=1)$    | +0.0-14.3i   | ${}^5T_{2g}(2)(MS=1) \cdot {}^5E_g(1)(MS=2)$    | -130.7-36.8i |
| ${}^5T_{2g}(2)(MS=2) \cdot {}^5E_g(1)(MS=1)$    | +130.7-36.8i | ${}^5T_{2g}(2)(MS=2) \cdot {}^5E_g(1)(MS=2)$    | +0.0-28.6i   |
| ${}^5T_{2g}(2)(MS=-2) \cdot {}^5E_g(2)(MS=-2)$  | -0.0-196.5i  | ${}^5T_{2g}(2)(MS=-2) \cdot {}^5E_g(2)(MS=-1)$  | +2.1-98.4i   |
| ${}^5T_{2g}(2)(MS=-1) \cdot {}^5E_g(2)(MS=-2)$  | -2.1-98.4i   | ${}^5T_{2g}(2)(MS=-1) \cdot {}^5E_g(2)(MS=-1)$  | -0.0-98.3i   |
| ${}^5T_{2g}(2)(MS=-1) \cdot {}^5E_g(2)(MS=0)$   | +2.6-120.5i  | ${}^5T_{2g}(2)(MS=0) \cdot {}^5E_g(2)(MS=-1)$   | -2.6-120.5i  |
| ${}^5T_{2g}(2)(MS=0) \cdot {}^5E_g(2)(MS=1)$    | +2.6-120.5i  | ${}^5T_{2g}(2)(MS=1) \cdot {}^5E_g(2)(MS=0)$    | -2.6-120.5i  |
| ${}^5T_{2g}(2)(MS=1) \cdot {}^5E_g(2)(MS=1)$    | -0.0+98.3i   | ${}^5T_{2g}(2)(MS=1) \cdot {}^5E_g(2)(MS=2)$    | +2.1-98.4i   |
| ${}^5T_{2g}(2)(MS=2) \cdot {}^5E_g(2)(MS=1)$    | -2.1-98.4i   | ${}^5T_{2g}(2)(MS=2) \cdot {}^5E_g(2)(MS=2)$    | -0.0+196.5i  |
| ${}^5T_{2g}(3)(MS=-2) \cdot {}^5E_g(1)(MS=-2)$  | +0.0+263.2i  | ${}^5T_{2g}(3)(MS=-2) \cdot {}^5E_g(1)(MS=-1)$  | -59.0-108.7i |
| ${}^5T_{2g}(3)(MS=-1) \cdot {}^5E_g(1)(MS=-2)$  | +59.0-108.7i | ${}^5T_{2g}(3)(MS=-1) \cdot {}^5E_g(1)(MS=-1)$  | +0.0+131.6i  |
| ${}^5T_{2g}(3)(MS=-1) \cdot {}^5E_g(1)(MS=0)$   | -72.2-133.2i | ${}^5T_{2g}(3)(MS=0) \cdot {}^5E_g(1)(MS=-1)$   | +72.2-133.2i |
| ${}^5T_{2g}(3)(MS=0) \cdot {}^5E_g(1)(MS=1)$    | -72.2-133.2i | ${}^5T_{2g}(3)(MS=1) \cdot {}^5E_g(1)(MS=0)$    | +72.2-133.2i |
| ${}^5T_{2g}(3)(MS=1) \cdot {}^5E_g(1)(MS=1)$    | +0.0-131.6i  | ${}^5T_{2g}(3)(MS=1) \cdot {}^5E_g(1)(MS=2)$    | -59.0-108.7i |
| ${}^5T_{2g}(3)(MS=2) \cdot {}^5E_g(1)(MS=1)$    | +59.0-108.7i | ${}^5T_{2g}(3)(MS=2) \cdot {}^5E_g(1)(MS=2)$    | +0.0-263.2i  |
| ${}^5T_{2g}(3)(MS=-2) \cdot {}^5E_g(2)(MS=-2)$  | -0.0+87.3i   | ${}^5T_{2g}(3)(MS=-2) \cdot {}^5E_g(2)(MS=-1)$  | +3.2+76.6i   |
| ${}^5T_{2g}(3)(MS=-1) \cdot {}^5E_g(2)(MS=-2)$  | -3.2+76.6i   | ${}^5T_{2g}(3)(MS=-1) \cdot {}^5E_g(2)(MS=-1)$  | -0.0+43.7i   |
| ${}^5T_{2g}(3)(MS=-1) \cdot {}^5E_g(2)(MS=0)$   | +3.9+93.8i   | ${}^5T_{2g}(3)(MS=0) \cdot {}^5E_g(2)(MS=-1)$   | -3.9+93.8i   |
| ${}^5T_{2g}(3)(MS=0) \cdot {}^5E_g(2)(MS=1)$    | +3.9+93.8i   | ${}^5T_{2g}(3)(MS=1) \cdot {}^5E_g(2)(MS=0)$    | -3.9+93.8i   |
| ${}^5T_{2g}(3)(MS=1) \cdot {}^5E_g(2)(MS=1)$    | -0.0-43.7i   | ${}^5T_{2g}(3)(MS=1) \cdot {}^5E_g(2)(MS=2)$    | +3.2+76.6i   |
| ${}^5T_{2g}(3)(MS=2) \cdot {}^5E_g(2)(MS=1)$    | -3.2+76.6i   | ${}^5T_{2g}(3)(MS=2) \cdot {}^5E_g(2)(MS=2)$    | -0.0-87.3i   |
| ${}^5E_g(1)(MS=-2) \cdot {}^5E_g(2)(MS=-2)$     | +0.0+30.7i   | ${}^5E_g(1)(MS=-2) \cdot {}^5E_g(2)(MS=-1)$     | -11.6-9.9i   |
| ${}^5E_g(1)(MS=-1) \cdot {}^5E_g(2)(MS=-2)$     | +11.6-9.9i   | ${}^5E_g(1)(MS=-1) \cdot {}^5E_g(2)(MS=-1)$     | +0.0+15.3i   |
| ${}^5E_g(1)(MS=-1) \cdot {}^5E_g(2)(MS=0)$      | -14.2-12.2i  | ${}^5E_g(1)(MS=0) \cdot {}^5E_g(2)(MS=-1)$      | +14.2-12.2i  |
| ${}^5E_g(1)(MS=0) \cdot {}^5E_g(2)(MS=1)$       | -14.2-12.2i  | ${}^5E_g(1)(MS=1) \cdot {}^5E_g(2)(MS=0)$       | +14.2-12.2i  |
| ${}^5E_g(1)(MS=1) \cdot {}^5E_g(2)(MS=1)$       | +0.0-15.3i   | ${}^5E_g(1)(MS=1) \cdot {}^5E_g(2)(MS=2)$       | -11.6-9.9i   |
| ${}^5E_g(1)(MS=2) \cdot {}^5E_g(2)(MS=1)$       | +11.6-9.9i   | ${}^5E_g(1)(MS=2) \cdot {}^5E_g(2)(MS=2)$       | +0.0-30.7i   |

## Notes and references

- 1 B. A. Finney, S. R. Chowdhury, C. Kirkvold and B. Vlasisvljevich, *Phys. Chem. Chem. Phys.*, 2022, **24**, 1390–1398.
